# Supplementary material
Source: HighWire-hosted journal article supplement (https://err.ersjournals.com/content/26/143/160033)
Supplement: inline-supplementary-material-1 [file inline-supplementary-material-1.pdf]

## Supplementary text: Full search

Our PubMed search on 27<sup>th</sup> October 2015 contains of this combination:

((("Pulmonary Disease, Chronic Obstructive"[Mesh] OR "COPD"[tw] OR "Chronic Obstructive Pulmonary Disease"[tw] OR "Chronic Obstructive Pulmonary Diseases"[tw] OR "COAD"[tw] OR "Chronic Obstructive Airway Disease"[tw] OR "Chronic Obstructive Lung Disease"[tw] OR "Chronic Obstructive Airway Diseases"[tw] OR "Chronic Obstructive Lung Diseases"[tw] OR "Chronic Airflow Obstructions"[tw] OR "Chronic Airflow Obstruction"[tw] OR "Chronic Bronchitis"[tw] OR "Pulmonary Emphysema"[tw]) AND ("Morning symptoms"[tw] OR ((morning\*[tw] OR "time of day"[tw]) AND (symptom\*[tw] OR routine\*[tw] OR activit\*[tw] OR limitation\*[tw] OR complaint\*[tw] OR "Signs and Symptoms, Respiratory"[Mesh] OR "Sputum"[mesh] OR "sputum"[tw] OR "cough"[tw] OR cough\*[tw] OR breathless\*[tw] OR "Shortness of Breath"[tw] OR "Breath Shortness"[tw] OR "short of breath"[tw] OR dyspnea\*[tw] OR dyspnoe\*[tw] OR "wheezing"[tw] OR "chest tightness"[tw]))) AND ("activity"[tw] OR "activities"[tw] OR "inactivity"[tw] OR "inactivities"[tw] OR "Motor Activity"[Mesh] OR "physical inactivity"[tw] OR "physical activity"[tw] OR "physical activities"[tw] OR "locomotor activity"[tw] OR "locomotor activities"[tw] OR "motor activity"[tw] OR "motor activities"[tw] OR "Exercise"[tw] OR "Circuit-Based Exercise"[tw] OR "Cool-Down Exercise"[tw] OR "Muscle Stretching Exercises"[tw] OR "Physical Conditioning"[tw] OR "Plyometric Exercise"[tw] OR "Resistance Training"[tw] OR "Running"[tw] OR "Jogging"[tw] OR "Swimming"[tw] OR "Walking"[tw] OR "Warm-Up Exercise"[tw] OR "Cataleptic Freezing Reaction"[tw] OR "Tonic Immobility Response"[tw] OR "Pronation"[tw] OR "Supination"[tw] OR "Exercises"[tw] OR "Cool-Down Exercises"[tw] OR "Muscle Stretching Exercise"[tw] OR "Plyometric Exercises"[tw] OR "Warm-Up Exercises"[tw] OR "Human Activities"[Mesh] OR routine\*[tw]))))
